# Supplementary material
Source: PubMed Central journal article supplement (PMC1924583)
Supplement: pnas_0609752104_2.pdf [file pnas_0609752104_2.pdf]

**TABLE 2. Antiandrogen activity of phenothiazine derivatives as determined by inhibition of DHT-stimulated CAT activity**

| <i>D1</i>                                                                                                           | <i>D2</i>                                                                                                            | <i>D3</i>                                                                                                            | <i>D4</i>                                                                                                             |
|---------------------------------------------------------------------------------------------------------------------|----------------------------------------------------------------------------------------------------------------------|----------------------------------------------------------------------------------------------------------------------|-----------------------------------------------------------------------------------------------------------------------|
| 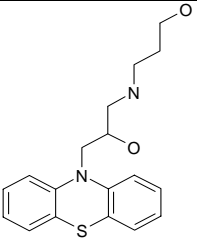 <p><b>AR(-) = 9.0 ± 0.5%*</b></p> |  <p><b>AR(-) = 2.4 ± 0.5%</b></p>   |  <p><b>AR(-) = 2.8 ± 0.1%</b></p>  |  <p><b>AR(-) = 53.0 ± 0.7%</b></p> |
| <i>D5</i>                                                                                                           | <i>D6</i>                                                                                                            | <i>D7</i>                                                                                                            | <i>D8</i>                                                                                                             |
|  <p><b>AR(-) = n/a</b></p>         |  <p><b>AR(-) = n/a</b></p>          |  <p><b>AR(-) = 11.9 ± 0.2%</b></p> |  <p><b>AR(-) = n/a</b></p>         |
| <i>D9</i>                                                                                                           | <i>D10</i>                                                                                                           |                                                                                                                      |                                                                                                                       |
|  <p><b>AR(-) = n/a</b></p>       |  <p><b>AR(-) = 2.4 ± 0.2%</b></p> |                                                                                                                      |                                                                                                                       |

The data are mean ± SEM of triplicate; n/a, no significant antagonism was observed.

\*antiandrogen activity is expressed as degree of inhibition of the reporter gene transactivation by 500 nM of indicated ligand in the presence of 1 nM DHT.
